# Supplementary material for: Use of Microbially Treated Olive Mill Wastewaters as Soil Organic Amendments; Their Short-Term Effects on the Soil Nematode Community
Source: MDPI journal article supplement (doi:10.3390/d15040497), 2023-03-29
Supplement: s1 [file s1]

Archive with 1 entries (1 files):
- diversity-2222083-supplementary.pdf
