# Supplementary material for: Use of Microbially Treated Olive Mill Wastewaters as Soil Organic Amendments; Their Short-Term Effects on the Soil Nematode Community
Source: MDPI journal article supplement (doi:10.3390/d15040497), 2023-03-29
Supplement: s1 [file s1 › diversity-2222083-supplementary.pdf]

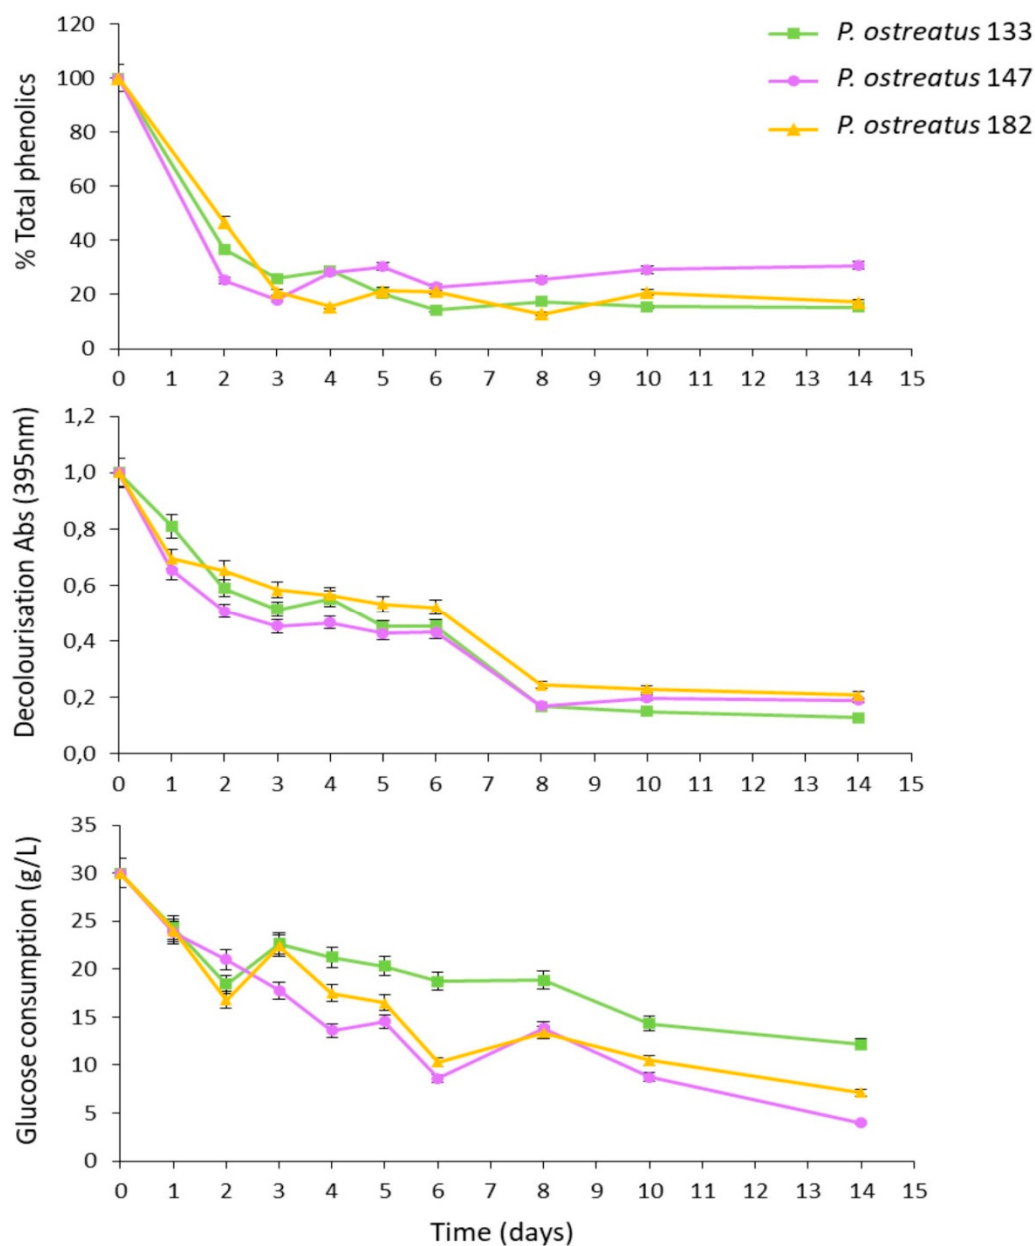

**Figure S1.** The effect of the three selected fungal strains on reducing the medium's total phenolics, decolorization and glucose consumption during a 14-d incubation period in 10% v/v OMW.

**Table S1.** A layout of the metrics referring to the architecture of the network.

| Metrics                | Explanation                                                                                                                                                                                                                                           |
|------------------------|-------------------------------------------------------------------------------------------------------------------------------------------------------------------------------------------------------------------------------------------------------|
| Centrality             | A measure of the importance of a node within the network.                                                                                                                                                                                             |
| Degree Centralization  | The sum of the weighted ties of the links. The normalized values equal to (number of nodes-1) multiplied by max value                                                                                                                                 |
| In degree centrality   | For a node, the number of head ends adjacent to the node is called the indegree. Indegree and outdegree applied at directed networks                                                                                                                  |
| Density                | The number of ties divided by the maximum number of possible ties.                                                                                                                                                                                    |
| Fragmentation          | The proportion of pairs of nodes that cannot reach each other.                                                                                                                                                                                        |
| Clustering coefficient | Measures how much the neighbors of each node are also neighbors of each other. The clustering coefficient of a node is the density of its open neighbors. The clustering coefficient of a network is the average clustering coefficient of its nodes. |
| Average Distance       | The distance between two nodes is the number of ties contained in the shortest path that connects them.                                                                                                                                               |
| Compactness            | Measure of the probability of two nodes to be directly tied.                                                                                                                                                                                          |
| Small Worldness        | A real network is a small-world network if it has a similar mean shortest path length but greater clustering coefficient compared to a random network with the same number of nodes.                                                                  |
| Modularity             | The possibility of various nodes being grouped together.                                                                                                                                                                                              |
